# Supplementary material
Source: HighWire-hosted journal article supplement (https://gut.bmj.com/content/72/10/1848)
Supplement: inline-supplementary-material-2 [file inline-supplementary-material-2.pdf]

## Mishra et al Supplementary Figure S2

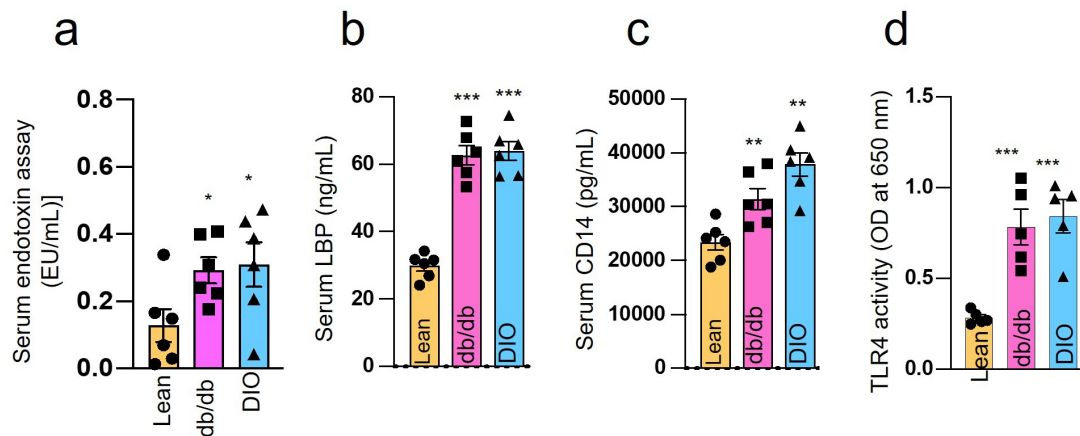

**Supplementary Figure S2.** a) The levels of endotoxin/ LPS (a), LPS-binding protein, and LBP (b), sCD14 (c) were significantly higher in obese donor (db/db and DIO-diet induced obese) mice as compared to control (B6 NC [normal chow]) mice. d) Serum of obese (db/db and DIO) mice also significantly increased TLR4 activity in HEK-Blue mTLR4 cells compared to serum of lean controls. Values presented are mean (n=5-8 mice per group and 2-3 repeats of cell culture triplicates) and error bars are the standard error of means. P values with \*\*\*<0.001 are statistically significant calculated by the t-test.
