# Supplementary material
Source: HighWire-hosted journal article supplement (https://gut.bmj.com/content/72/10/1848)
Supplement: inline-supplementary-material-3 [file inline-supplementary-material-3.pdf]

Mishra et al Supplementary Figure S3

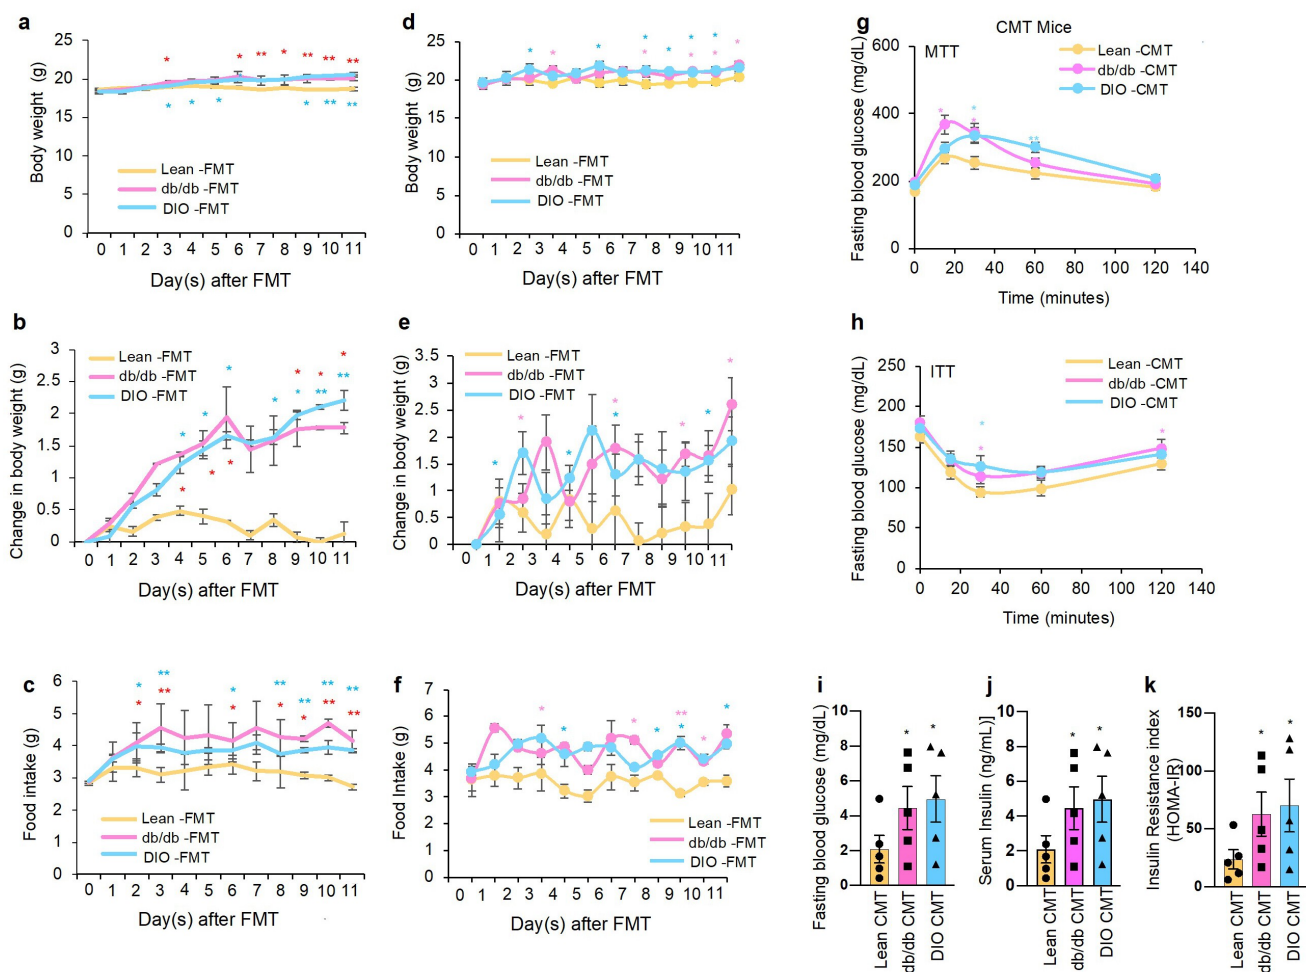

**Supplementary Figure S3.** Impact of fecal microbiome transplantation (FMT) (a-f) from db/db and DIO mice on body weight (a), change in body weight (b), and food intake (c) in recipient mice. In addition, the cecal microbiota transplantation (CMT) of obese (db/db and DIO) also increased impairment in meal tolerance test (MTT) (g), insulin tolerance test (ITT) (h), and increased fasting blood glucose (i), serum insulin, and insulin resistance index (HOMA-IR) (k) compared to lean CMT recipient control mice. Values presented are mean (n=5-8 mice per group), and error bars are the standard error of means. P values with \* $<0.05$ ; \*\* $<0.001$ ; \*\*\* $<0.001$  are statistically significant calculated by the t-test and ANOVA.
