# Supplementary material
Source: HighWire-hosted journal article supplement (https://gut.bmj.com/content/72/10/1848)
Supplement: inline-supplementary-material-6 [file inline-supplementary-material-6.pdf]

## Mishra et al Supplementary Figure S5

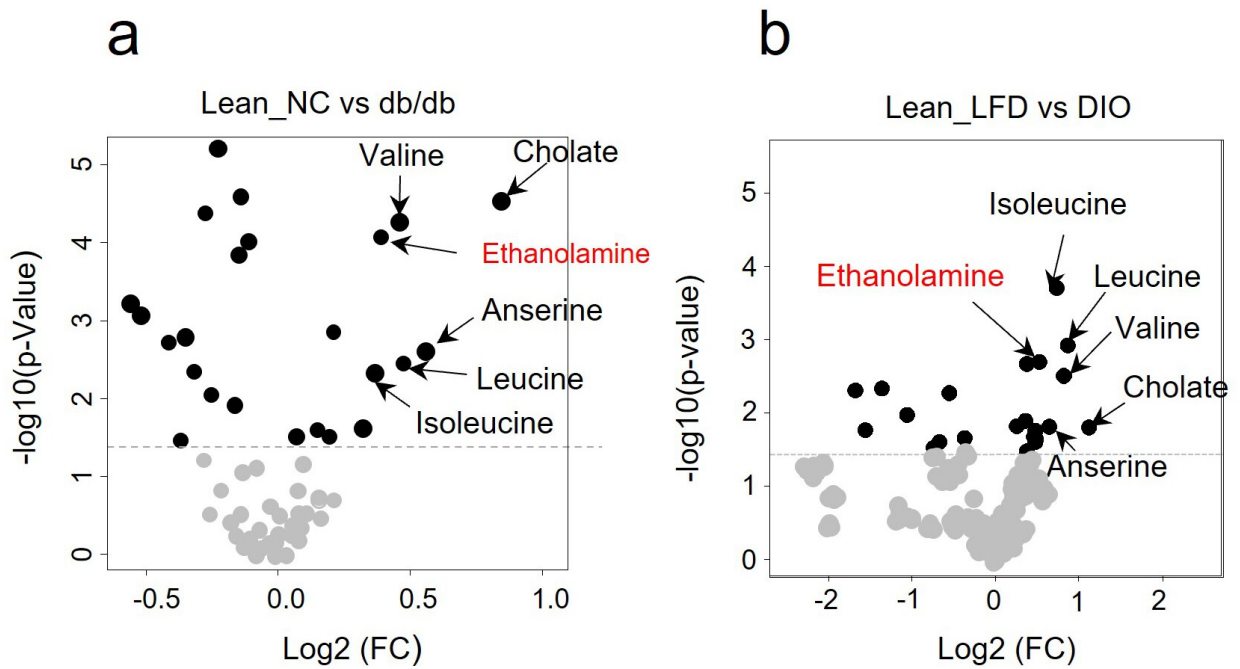

**Supplementary Figure S5.** a,b) The volcano graphs depicting the abundance of metabolites in the feces of donor db/db (a) and DIO (b) mice compared to their controls. Values presented are mean (n=5-8 mice per group).
