# Supplementary material
Source: HighWire-hosted journal article supplement (https://gut.bmj.com/content/72/10/1848)
Supplement: inline-supplementary-material-7 [file inline-supplementary-material-7.pdf]

# Mishra et al Supplementary Figure S6

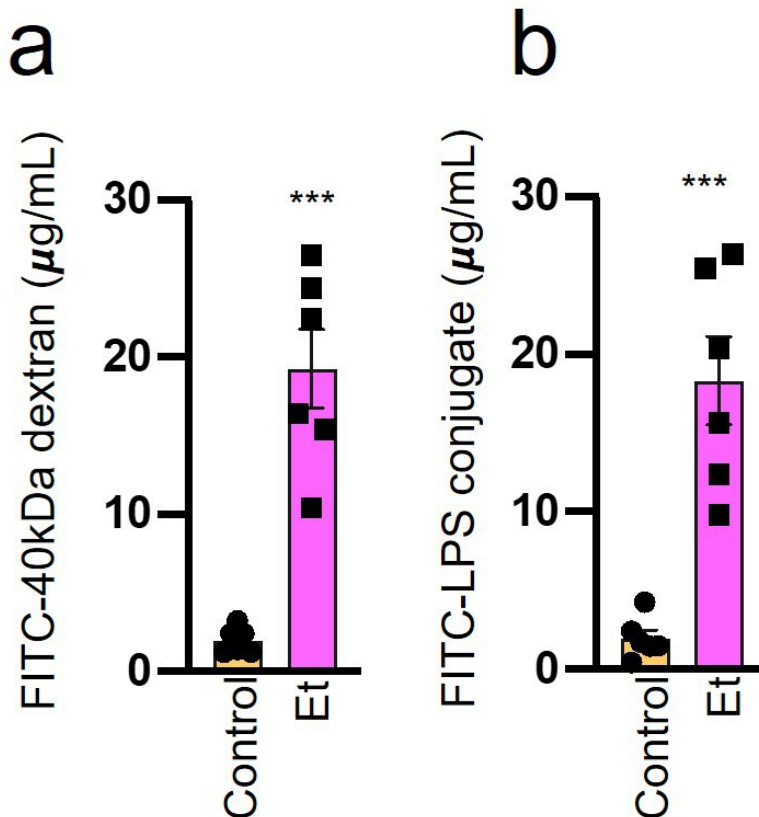

**Supplementary Figure S6.** a,b) Ethanolamine (Et) treatment significantly increased the permeability of FITC (40kDa and LPS conjugate)- dextran (a,b) in the monolayers of Caco-2 cells. Values presented are the mean of Caco-2 culture experiments performed in triplicates and repeated 2-3 times and error bars as the standard error of means. P values with \*\*\*<0.001 are statistically significant calculated by the t-test.
