# Supplementary material
Source: HighWire-hosted journal article supplement (https://gut.bmj.com/content/72/10/1848)
Supplement: inline-supplementary-material-8 [file inline-supplementary-material-8.pdf]

## Mishra et al Supplementary Figure S7

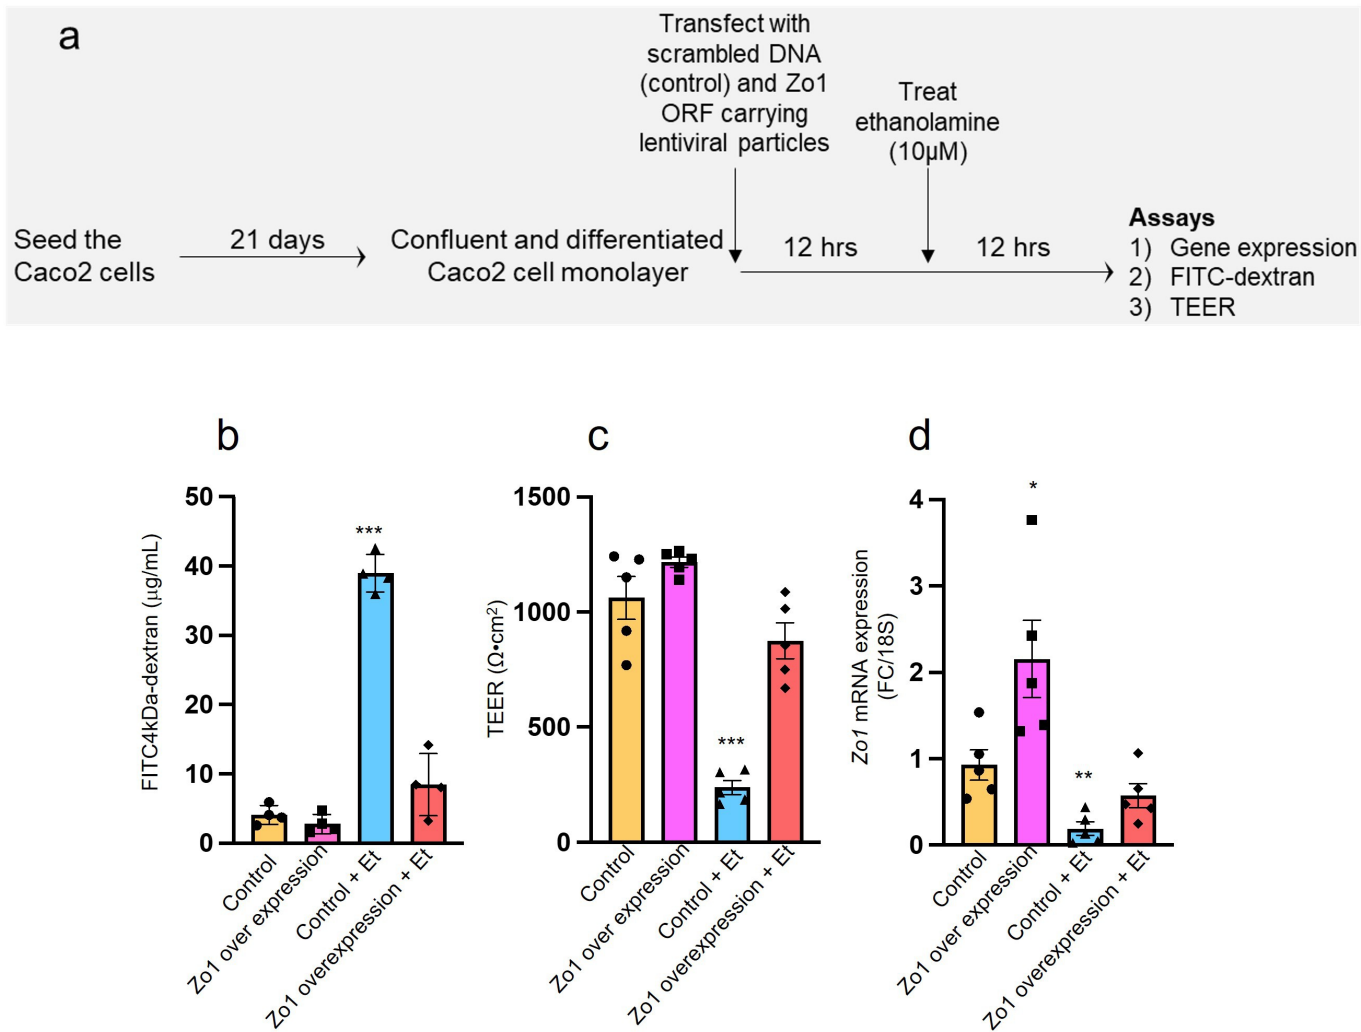

**Supplementary Figure S7. Ethanolamine induces gut permeability in Zo1 over-expressing Caco2 cells.** a) A schema of experimental design for differentiating Caco2 cells and transduction with lentivirus and ethanolamine (Et) treatment as well as measurement schedules. b,c) Ethanolamine treatment significantly increased FITC-dextran permeability and reduced TEER in Zo1 overexpressing Caco2 cell monolayers compared to scrambled DNA lentivirus transduced cells (control). d) Zo1 mRNA expression confirmed in Caco2 cells increased in Zo1 ORF lentivirus transduced cells compared to controls. Values presented are the mean of Caco-2 culture experiments performed in triplicates and repeated at least two times, and error bars as the standard error of means. P values with \*\*\*<0.001 are statistically significant calculated by the t-test and/or ANOVA.
