# Supplementary material
Source: HighWire-hosted journal article supplement (https://gut.bmj.com/content/72/10/1848)
Supplement: inline-supplementary-material-10 [file inline-supplementary-material-10.pdf]

## Mishra et al Supplementary Figure S8

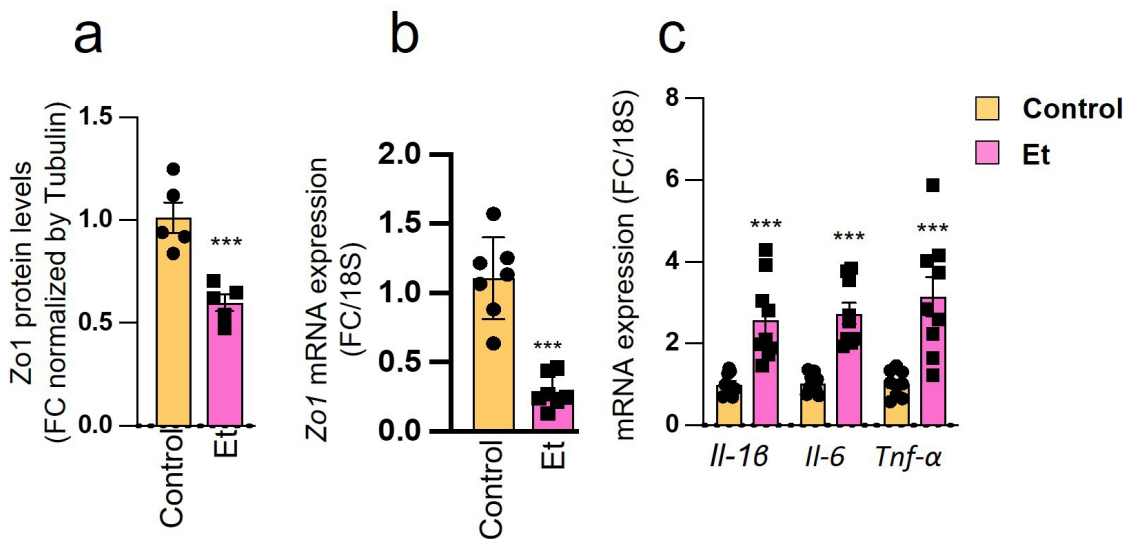

**Supplementary Figure S8.** a) Densitometric analysis of quantitative expression of Zo1 protein in the intestine (ileum) of mice show that ethanolamine (7-days) treatment reduces Zo1 expression compared to non-treated controls. b,c) The 7-day ethanolamine treatment also significantly reduces the expression of Zo1 mRNA (b) and inflammatory markers (IL-1 $\beta$ , IL-6, and TNF- $\alpha$ ) (c) in the colon of mice. Values presented are the mean of 5-10 animals per group and error bars as the standard error of means. P values with \*\*\*<0.001 are statistically significant calculated by t-test.
