# Supplementary material
Source: HighWire-hosted journal article supplement (https://gut.bmj.com/content/72/10/1848)
Supplement: inline-supplementary-material-12 [file inline-supplementary-material-12.pdf]

## Mishra et al Supplementary Figure S10

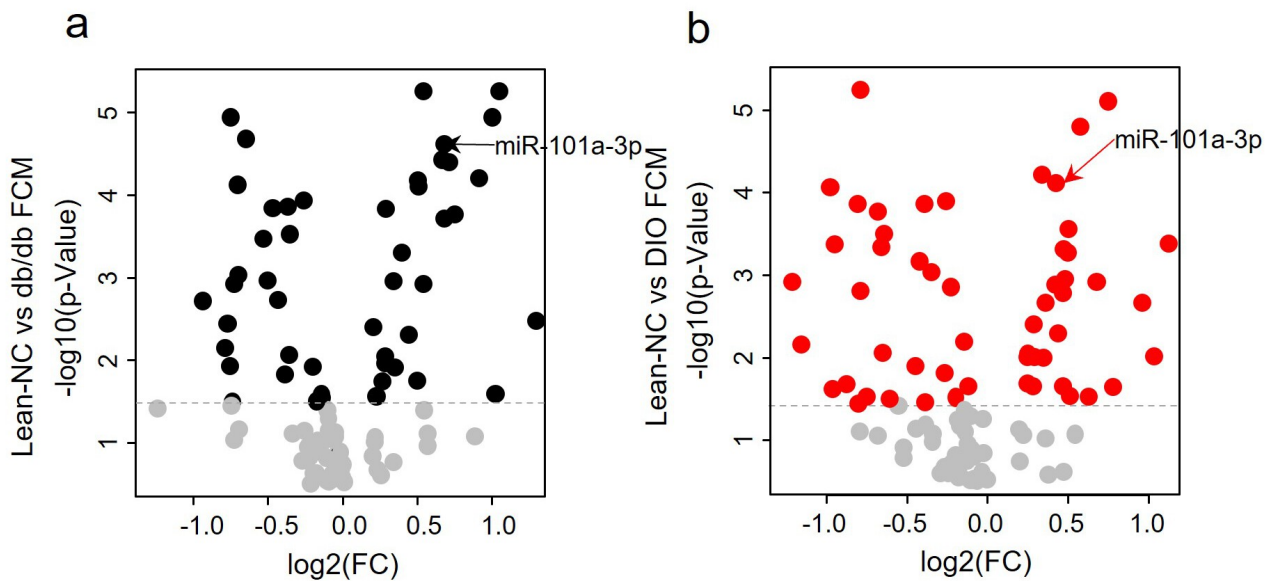

**Supplementary Figure S10.** Expression of miRNAs in the enteroids treated with FCMs of db/db (a) and DIO (b) compared to B6 control FCMs. Values presented are means of enteroid culture experiments performed in triplicates and repeated 2-3 times.
