# Supplementary material
Source: HighWire-hosted journal article supplement (https://gut.bmj.com/content/72/10/1848)
Supplement: inline-supplementary-material-13 [file inline-supplementary-material-13.pdf]

# Mishra et al Supplementary Figure S11

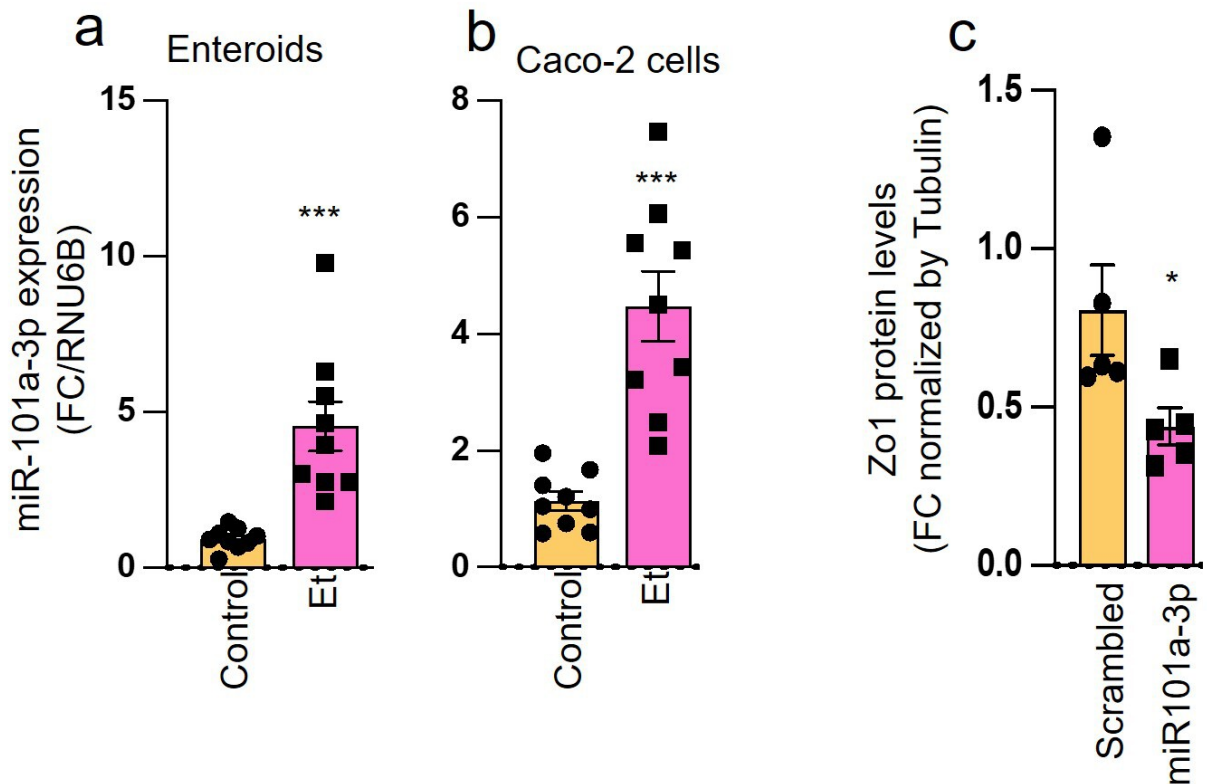

**Supplementary Figure S11.** Ethanolamine (Et) treatment in enteroids (a) and Caco-2 cells (b) significantly increased the expression of miR-101a-3p. c) Densitometric quantification of Zo1 protein expression in the intestine of mice treated with miR-101a-3p lentiviral enema treated compared to scrambled lentivirus treated controls. Values presented are the mean of enteroids and Caco-2 culture experiments performed in triplicates and repeated 2-3 times, and error bars as the standard error of means. P values with \*\*\*<0.001 are statistically significant, calculated by the t-test.
