# Supplementary material
Source: HighWire-hosted journal article supplement (https://gut.bmj.com/content/72/10/1848)
Supplement: inline-supplementary-material-14 [file inline-supplementary-material-14.pdf]

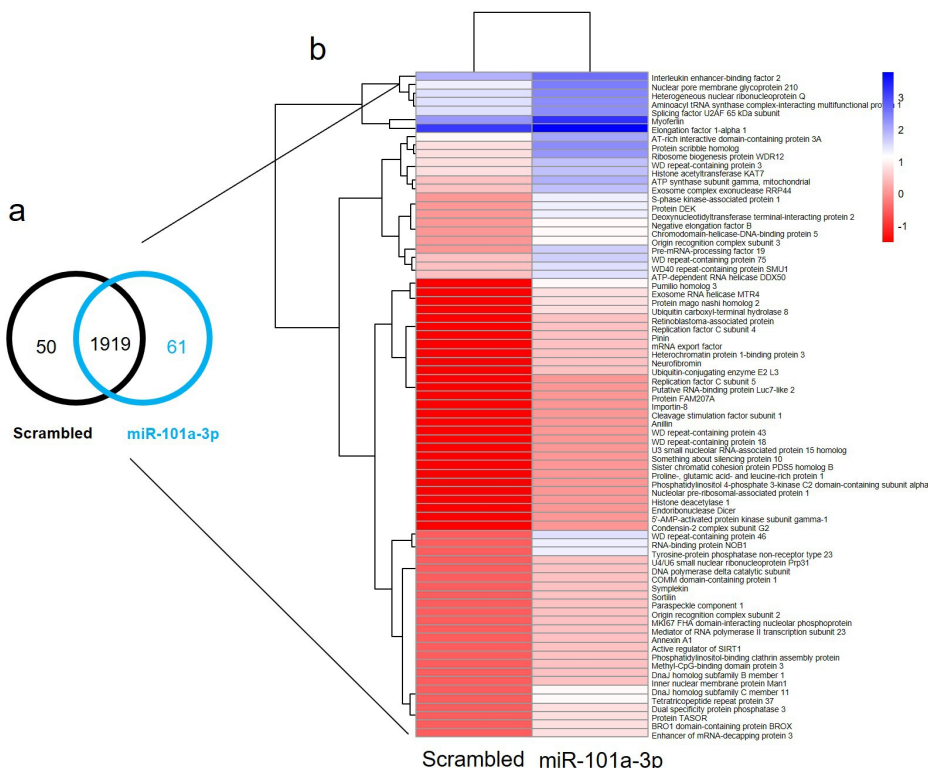

| Description                                         | Gene Name | Accession | FC (peptide-to-spectrum matches [PSM] values) |             | p-Value |
|-----------------------------------------------------|-----------|-----------|-----------------------------------------------|-------------|---------|
|                                                     |           |           | Scrambled                                     | miR-101a-3p |         |
| Proline-, glutamic acid- and leucine-rich protein 1 | PELP1     | Q8IZL8    | 1                                             | 4           | 0.0506  |
| AT-rich interactive domain-containing protein 3A    | ARID3a    | Q99856    | 1                                             | 3           | 0.0454  |
| WD repeat-containing protein 43                     | WDR43     | Q15061    | 1                                             | 3           | 0.1870  |
| Nuclear pore membrane glycoprotein 210              | NUP210    | Q8TEM1    | 1                                             | 2.285       | 0.0370  |
| Elongation factor 1-alpha 1                         | EEF1A1    | P68104    | 1                                             | 1.674       | 0.0428  |

**Supplementary Figure S12.** The number of proteins detected in global proteomics analyses pulled down in miR-101a-3p promoter transfected cells compared to scrambled transfected cells (a) and their abundance in fold change in a heatmap (b). c) The selected top 5 proteins that are abundantly binding to miR-101a-3p promoter.
