# Supplementary material
Source: HighWire-hosted journal article supplement (https://gut.bmj.com/content/72/10/1848)
Supplement: inline-supplementary-material-15 [file inline-supplementary-material-15.pdf]

Mishra et al Supplementary Figure S13

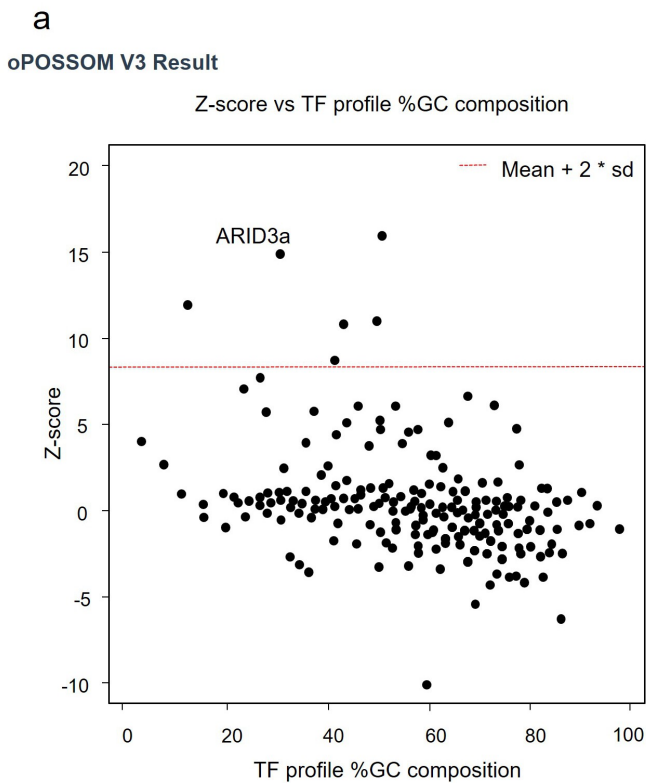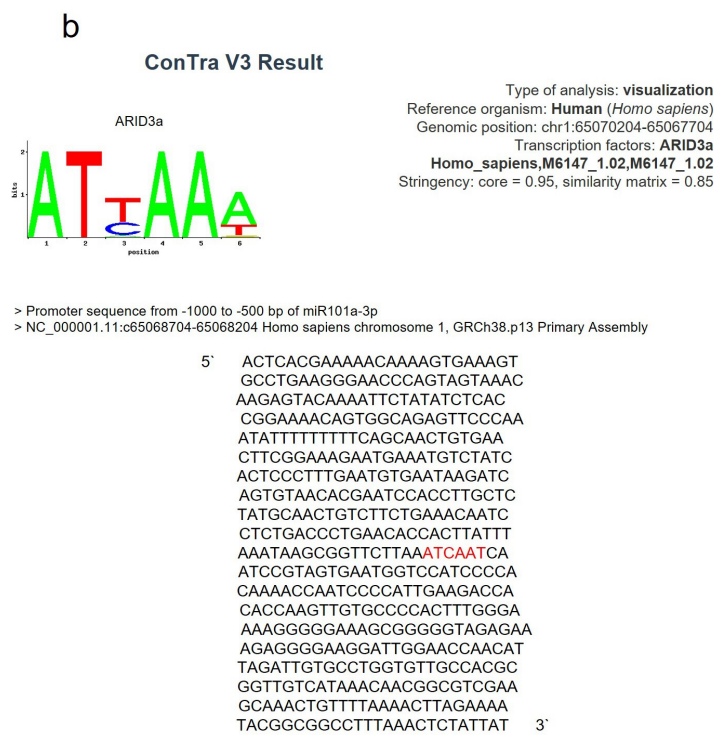

**Supplementary Figure S13.** *In-silico* analyses on search engines such as oPOSSOM V3 (a) and ConTra V3 (b) found that ARID3a has a predictive binding sequence on the miR-101a-3p promoter.
