# Supplementary material
Source: HighWire-hosted journal article supplement (https://gut.bmj.com/content/72/10/1848)
Supplement: inline-supplementary-material-16 [file inline-supplementary-material-16.pdf]

## Mishra et al Supplementary Figure S14

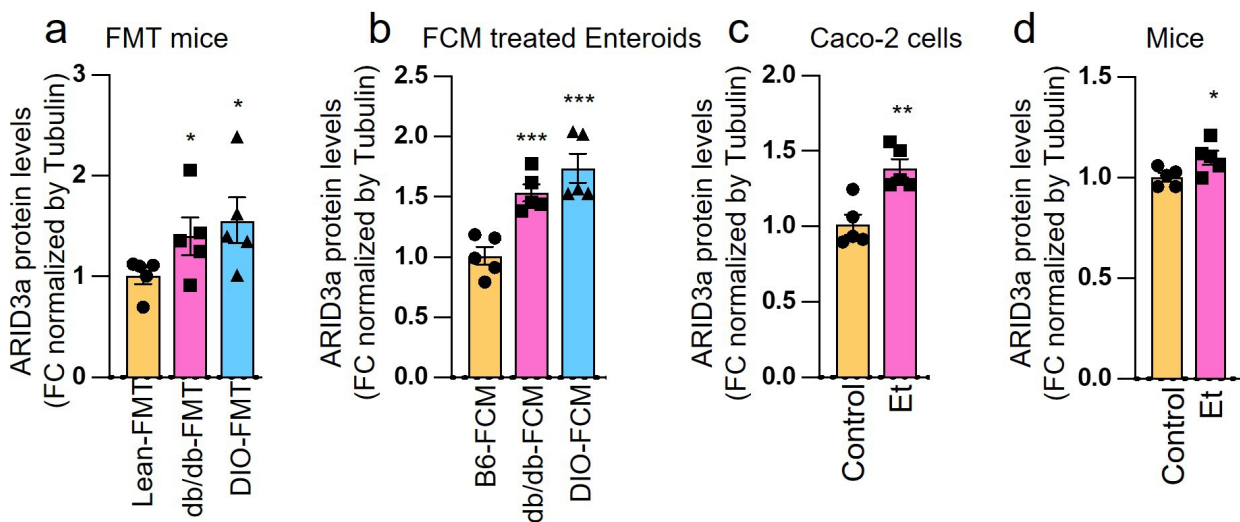

**Supplementary Figure S14.** Densitometric quantification of ARID3a protein expression in the intestine of FMT recipient mice (a), FCM-treated enteroids (b) and Caco2 cells (c); and in the intestines of ethanolamine (Et) treated mice (d) compared to their corresponding controls. Values presented are the mean of n=5-8 mice and enteroids and Caco-2 cell culture experiments performed in triplicates and repeated 2-3 times, and error bars are the standard error of means. P values with \* $<0.05$ ; \*\* $<0.01$ ; \*\*\* $<0.001$  are statistically significant calculated by the ANOVA and/or t-test.
