# Supplementary material
Source: HighWire-hosted journal article supplement (https://gut.bmj.com/content/72/10/1848)
Supplement: inline-supplementary-material-18 [file inline-supplementary-material-18.pdf]

## Mishra et al Supplementary Figure S16

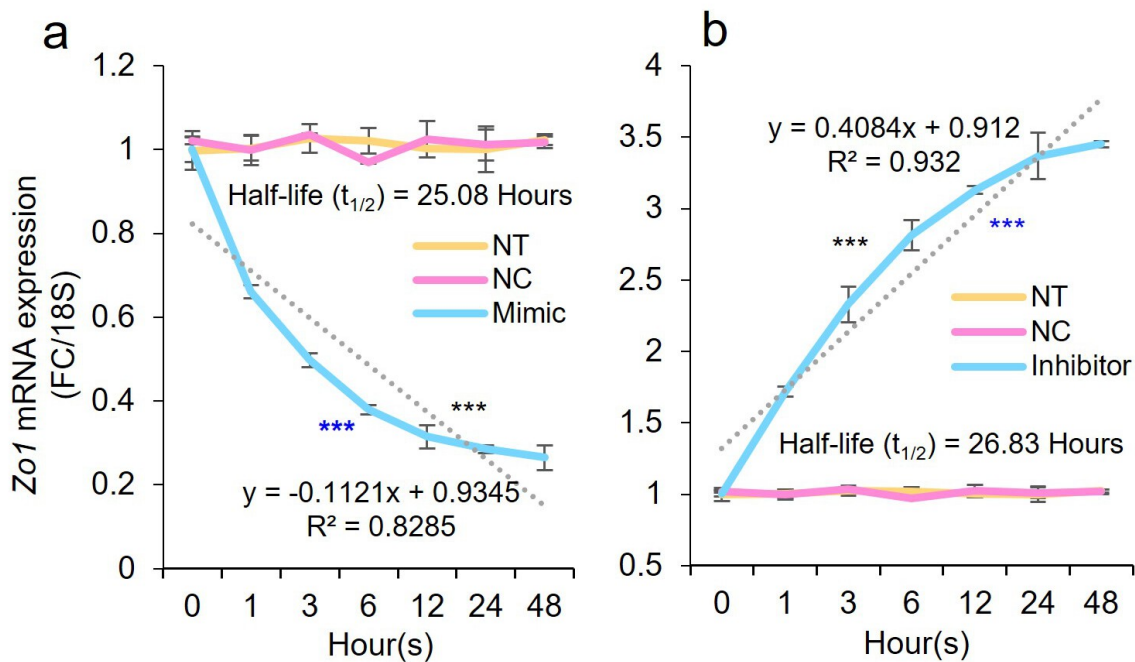

**Supplementary Figure S16.** a,b) *Zo1* mRNA stability significantly decreased in Caco-2 cells treated with miR-101a-3p mimetic (mimic) (a) and it was reversed by a miR-101a-3p inhibitor (b) compared to their controls. Values presented are the mean of Caco-2 culture experiments performed in triplicates and repeated 2-3 times, and error bars as the standard error of means. P values with \*\*\*<0.001 are statistically significant calculated by the ANOVA.
