# Supplementary material
Source: HighWire-hosted journal article supplement (https://gut.bmj.com/content/72/10/1848)
Supplement: inline-supplementary-material-19 [file inline-supplementary-material-19.pdf]

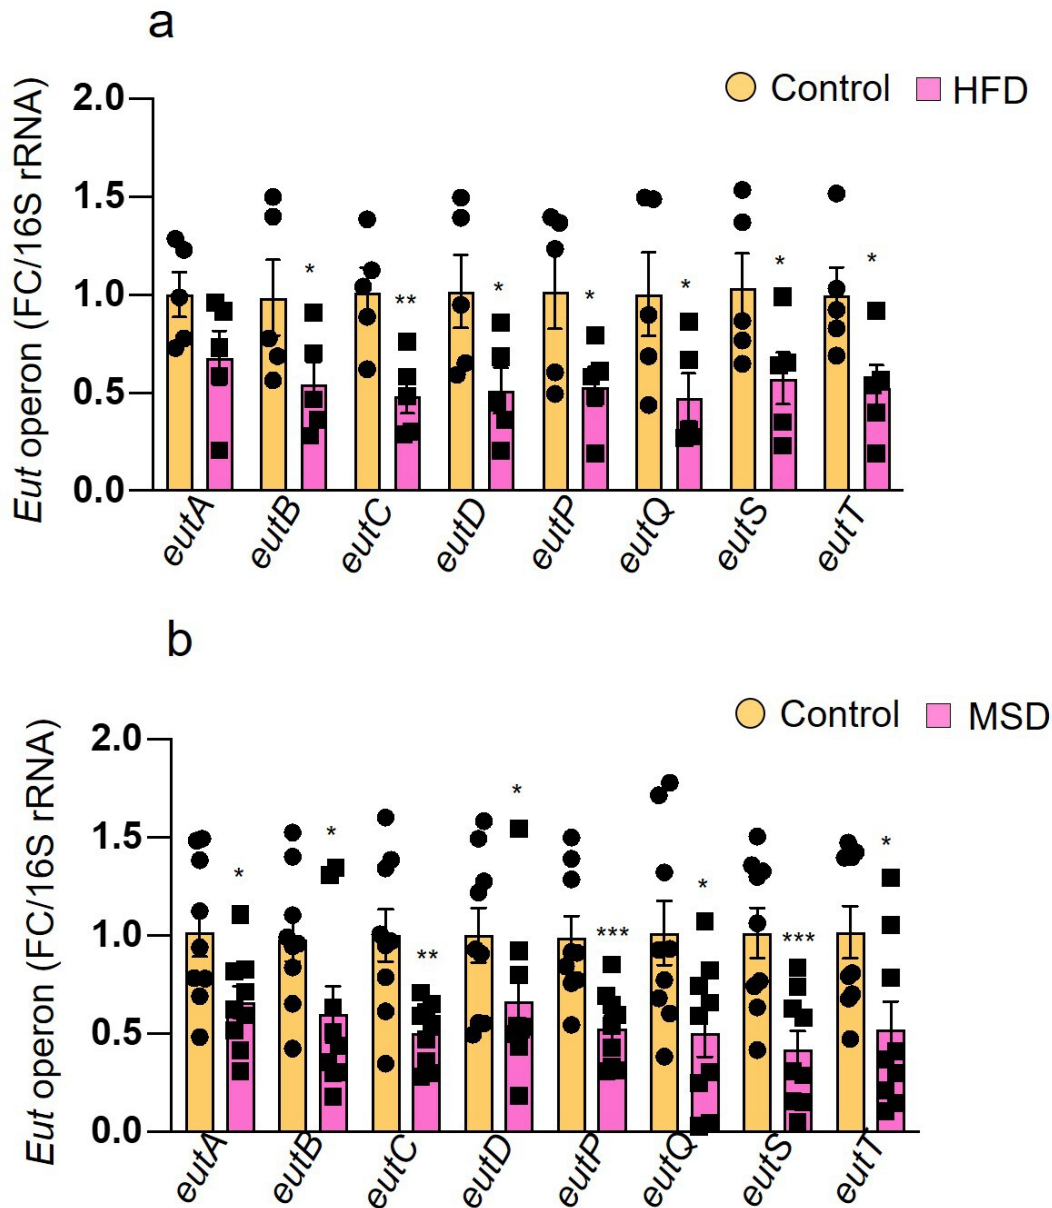

**Supplementary Figure S17.** a,b) Abundance of ethanolamine utilizing (*Eut*) genes in stool samples of mice fed with high-fat diet (HFD) (a) and meat-supplemented diet (MSD) (b) compared to their controls. Values are presented as means of 5-8 animals in each group and the standard error of means as error bars. P values with \* $<0.05$  were calculated by the t-test.
