# Supplementary material
Source: HighWire-hosted journal article supplement (https://gut.bmj.com/content/72/10/1848)
Supplement: inline-supplementary-material-21 [file inline-supplementary-material-21.pdf]

## Mishra et al Supplementary Figure S19

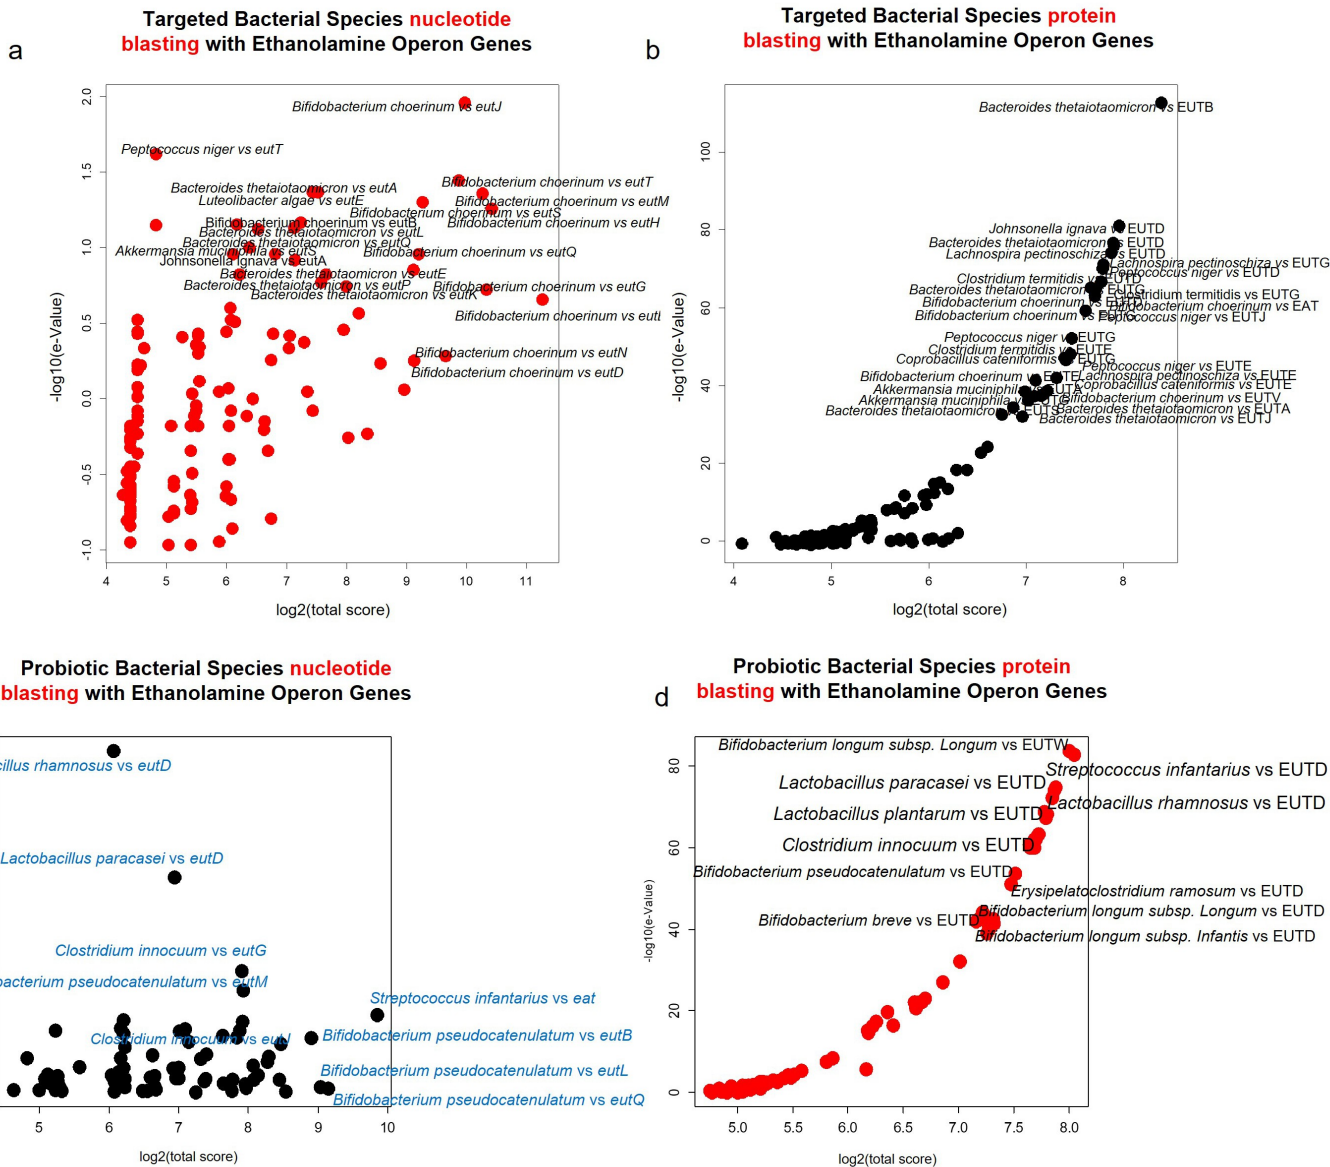

**Supplementary Figure S19.** a,b *In-silico* prediction analyses depicting that Eut operon presents in bacterial species using nucleotide (a) and protein (b) based BLAST analyses. Further, screen of Eut operon present in common probiotic bacterial using nucleotide (c) and protein (d) BLAST analyses.
