# Supplementary material
Source: HighWire-hosted journal article supplement (https://gut.bmj.com/content/72/10/1848)
Supplement: inline-supplementary-material-22 [file inline-supplementary-material-22.pdf]

## Mishra et al Supplementary Figure S20

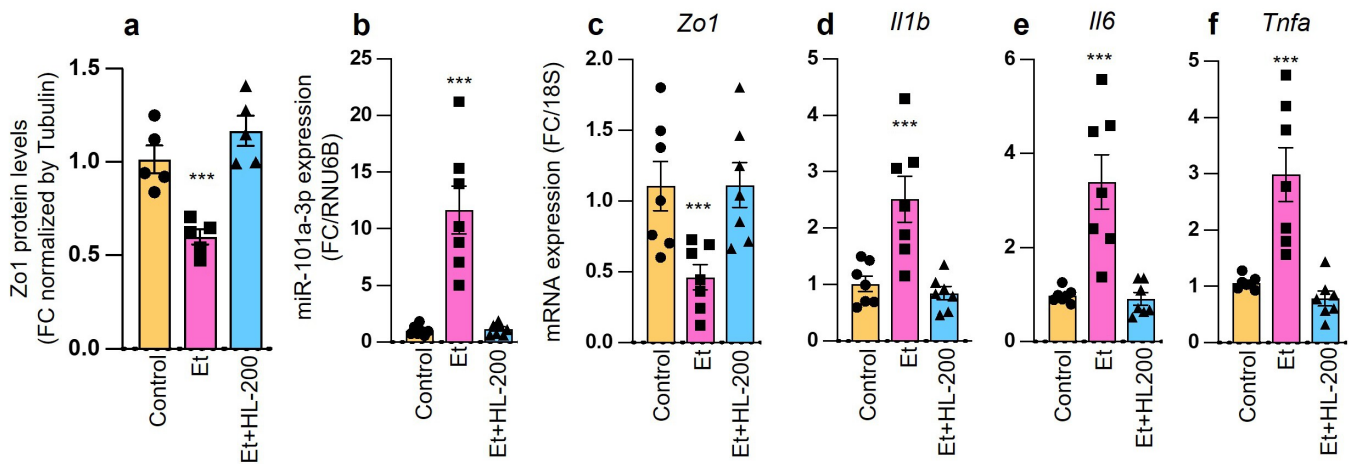

**Supplementary Figure S20.** a) Densitometric quantification of Zo1 protein expression in the intestine of mice treated with probiotic *Lactobacillus rhamnosus* HL-200 (HL-200) and ethanolamine (Et) compared to their controls. b-f) The impact of probiotic HL-200 expression of miR-101a-3p (b), *Zo1* (c) and inflammatory markers like *Il-1 $\beta$*  (d), *Il6* (e) and *Tnf- $\alpha$*  (f) in mice treated with ethanolamine compared to their control groups. Values presented are mean (n= 5-8 mice per group) and error bars as standard error of means. P values with \*\*\*<0.001 are statistically significant calculated by the t-test and ANOVA.
