# Supplementary material
Source: HighWire-hosted journal article supplement (https://gut.bmj.com/content/72/10/1848)
Supplement: inline-supplementary-material-23 [file inline-supplementary-material-23.pdf]

## Mishra et al Supplementary Figure S21

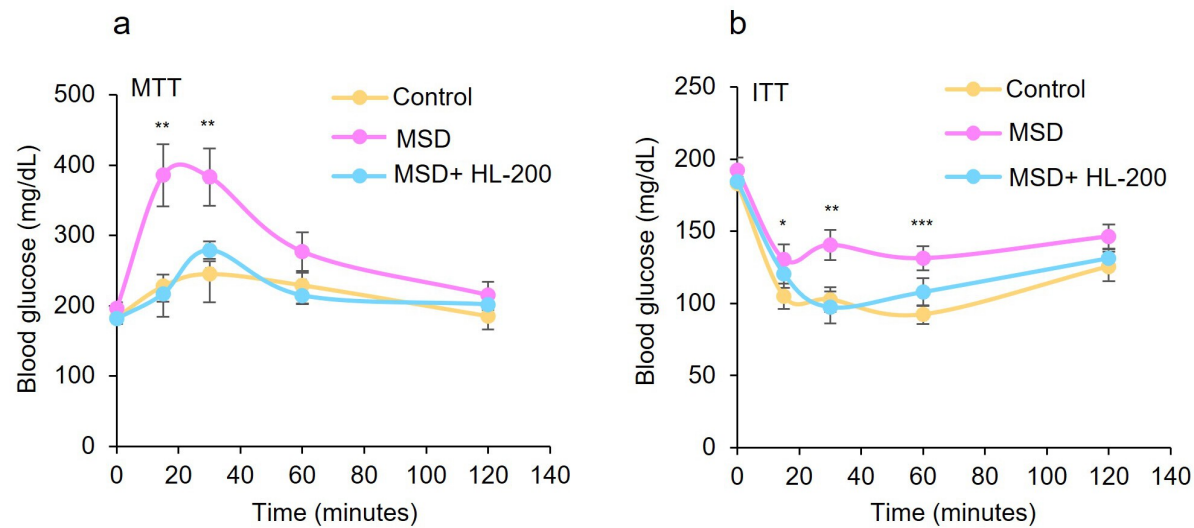

**Supplementary Figure S21.** a) Meal tolerance test (MTT) (a) and insulin tolerance test (ITT) (b) in mice fed with meat supplemented diet (MSD) and treated with probiotic *Lactobacillus rhamnosus* HL-200 (HL-200) compared to their controls. Values presented are mean (n= 5-8 mice per group) and error bars as standard error of means. P values with \*\*\*<0.001 are statistically significant calculated by the t-test and/or ANOVA.
