# Supplementary material
Source: HighWire-hosted journal article supplement (https://gut.bmj.com/content/72/10/1848)

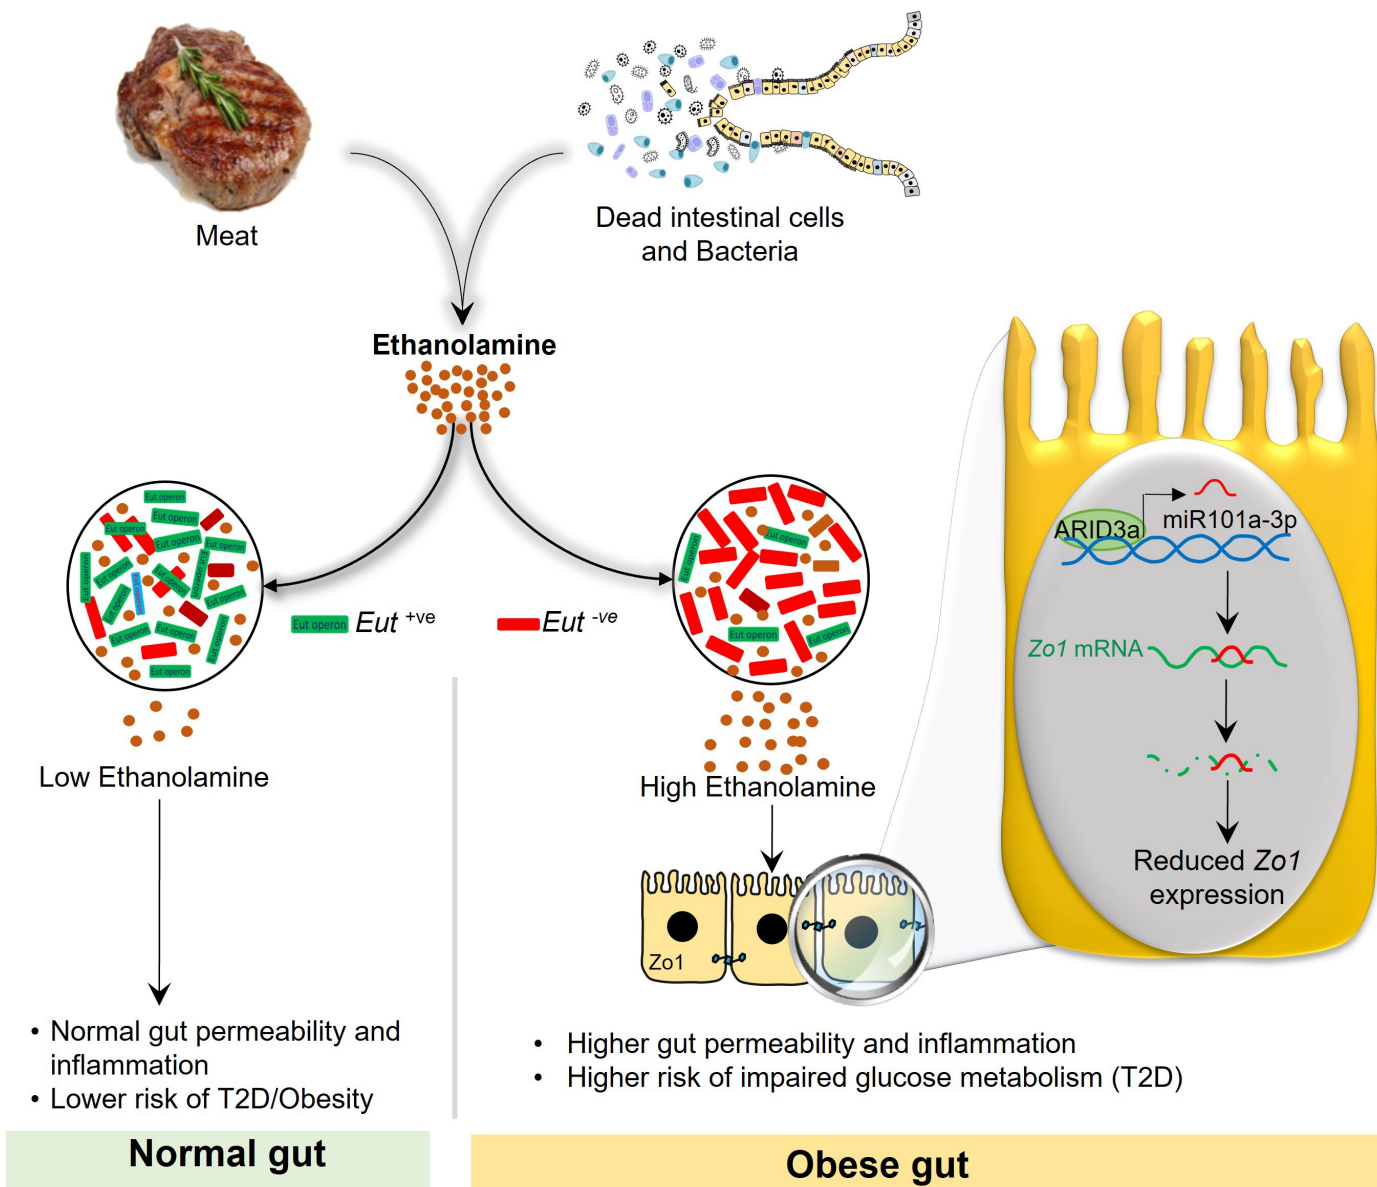

Supplement: inline-supplementary-material-24 [file inline-supplementary-material-24.pdf]
